# Supplementary material
Source: PubMed Central journal article supplement (PMC2837504)
Supplement: 11606_2009_1170_MOESM3_ESM.pdf [file 11606_2009_1170_MOESM3_ESM.pdf]

## **STANDARDIZED HAND-OFF EXPERIENCE GOALS AND OBJECTIVES**

### **Trainee goals:**

To create an interactive learning environment that will facilitate participant learning about strategies to improve patient safety concepts for trainees, specifically effective sign-out strategies.

### **Trainee learning objectives:**

By the end of this session, participants will:

- Describe the importance of standardized sign-out procedures [workshop]
- Identify potential barriers (environmental, cultural, communication, or other) that interfere with successful sign-outs [workshop]
- Develop a standardized sign-out procedure and apply learning concepts through a standardized hand-off scenario

### **Agenda:**

Trainees will be provided with the following:

1. A mock patient chart which includes the “patient” history and physical, medication administration record, admission orders and nursing notes.
2. A sign-out template for students to fill in pertinent data that they believe will be useful information for their covering colleague
